# Supplementary material
Source: PubMed Central journal article supplement (PMC5668204)
Supplement: NIHMS878486-supplement-Supp_FigS1-3.pdf [file NIHMS878486-supplement-Supp_FigS1-3.pdf]

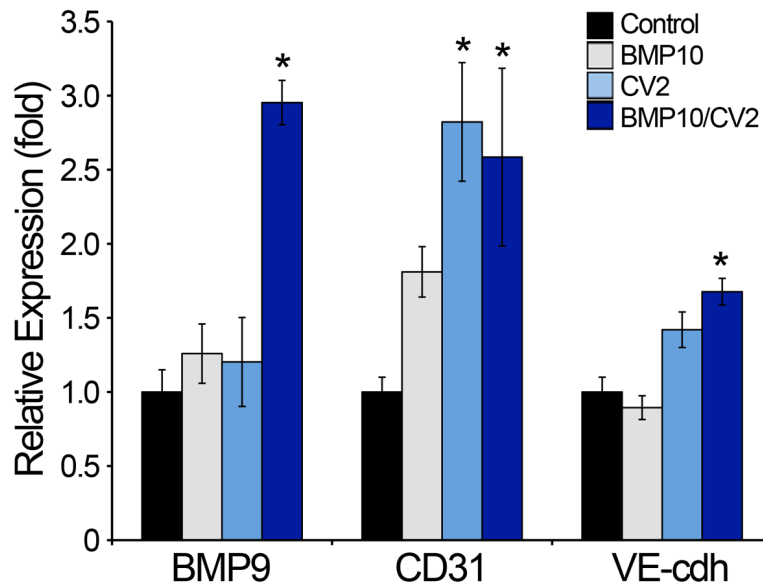

**Supplemental Figure 1**

Mouse DFAT cells were treated with growth medium (20% FBS) supplemented with control vehicle (day 5-7), BMP10 (25 ng/ml, day 5-7), CV2 (5-7) (50 ng/ml, day 5-7), BMP10 (day 5-7) followed by CV2 (day 8-10) (BMP10/CV2). Expression of BMP9 and the endothelial markers CD31 and VE-cadherin (VE-cdh) was determined after 3 weeks. \* $<0.1$  (n=3)

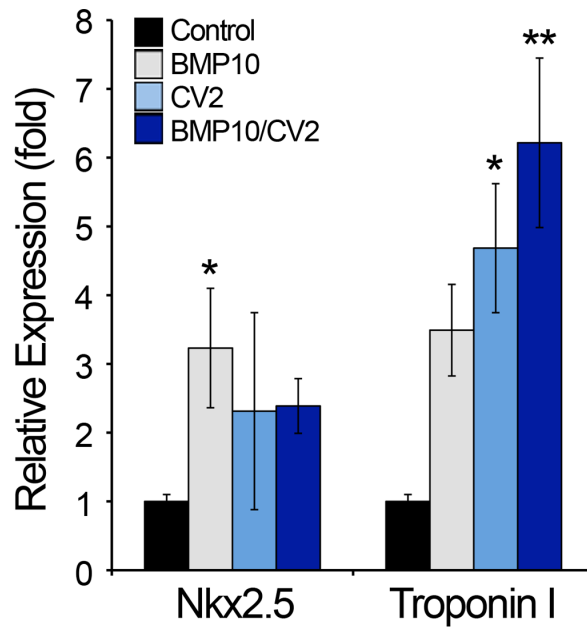

**Supplemental Figure 2**

Mouse DFAT cells were treated with growth medium, *containing only 10% FBS*, and supplemented with control vehicle (day 5-7), BMP10 (25 ng/ml, day 5-7), CV2 (5-7) (50 ng/ml, day 5-7), BMP10 (day 5-7) followed by CV2 (day 8-10) (BMP10/CV2). Expression of cardiomyocyte markers Nkx2.5 and Troponin I was determined after 3 weeks. \* $<0.1$ , \*\* $<0.01$  (n=3)

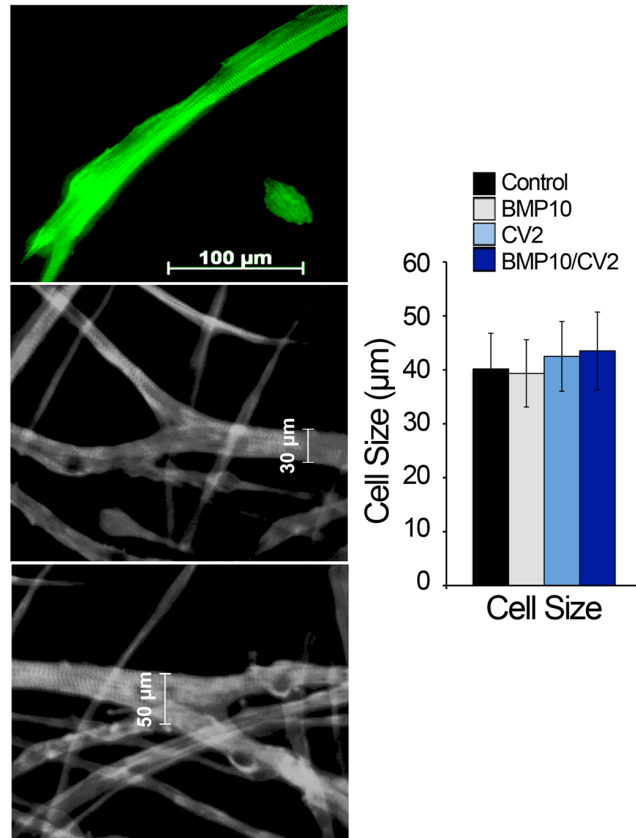

**Supplemental Figure 3**

Mouse DFAT cells were treated with growth medium (20% FBS) supplemented with control vehicle (day 5-7), BMP10 (25 ng/ml, day 5-7), CV2 (5-7) (50 ng/ml, day 5-7), BMP10 (day 5-7) followed by CV2 (day 8-10) (BMP10/CV2). The cell diameters were measured after each treatment as illustrated in the left panel, but no significant differences were seen between treatments (right panel).
